# Supplementary material for: National Trends in the Incidence, Management, and Outcomes of Heart Failure Complications in Patients Hospitalized for ST-Segment Elevation Myocardial Infarction
Source: PubMed Central journal article supplement — Mayo Clin Proc Innov Qual Outcomes. 2017 Jun 8;1(1):26–36. doi: 10.1016/j.mayocpiqo.2017.05.004 (PMC6135030; doi:10.1016/j.mayocpiqo.2017.05.004), 2017-06-08
Supplement: mmc1.pdf [file mmc1.pdf]

**Supplementary Table.** International Classification of Diseases, Ninth Edition, Clinical Modification and Clinical Classification Software Codes Used to Identify Comorbidities, In-hospital Procedures and Complications

| <b>Variable</b>                    | <b>Source</b> | <b>Code(s)</b>                                     |
|------------------------------------|---------------|----------------------------------------------------|
| STEMI                              | ICD-9-CM      | 410.x1 except 410.71                               |
| Cardiogenic shock                  | ICD-9-CM      | 785.51                                             |
| Smoking                            | ICD-9-CM      | V15.82, 305.1                                      |
| Dyslipidemia                       | CCS           | 53                                                 |
| Coronary Artery Disease            | ICD-9-CM      | 414                                                |
| Prior acute myocardial infarction  | ICD-9-CM      | 412                                                |
| Carotid artery disease             | ICD-9-CM      | 433.10                                             |
| Atrial fibrillation                | ICD-9-CM      | 427.31                                             |
| Diagnostic Coronary Angiographies  | ICD-9-CM      | 37.22, 37.23, 88.53, 88.54,<br>88.55, 88.56, 88.57 |
| Percutaneous Coronary Intervention | ICD-9-CM      | 00.66, 36.01, 36.02, 36.05,<br>36.06, 36.07        |
| Coronary Artery by-pass grafting   | ICD-9-CM      | 36.1x                                              |

ICD-9-CM = International Classification of Diseases, Ninth Edition, Clinical Modification;

CCS = Clinical Classification Software; STEMI = ST-elevation myocardial infarction
